# Supplementary material for: Single-cell sequencing of ascites fluid illustrates heterogeneity and therapy-induced evolution during gastric cancer peritoneal metastasis
Source: PubMed Central journal article supplement (PMC9929081; doi:10.1038/s41467-023-36310-9), 2023-02-14
Supplement: 41467_2023_36310_MOESM1_ESM.pdf [file 41467_2023_36310_MOESM1_ESM.pdf]

**Single-cell sequencing of ascites fluid illustrates heterogeneity and therapy-induced evolution during gastric cancer peritoneal metastasis**

**Supplementary Figure and Supplementary Tables:**

**Supplementary Figure and Supplementary Figure Legends:**

**Supplementary Fig. 1-7**



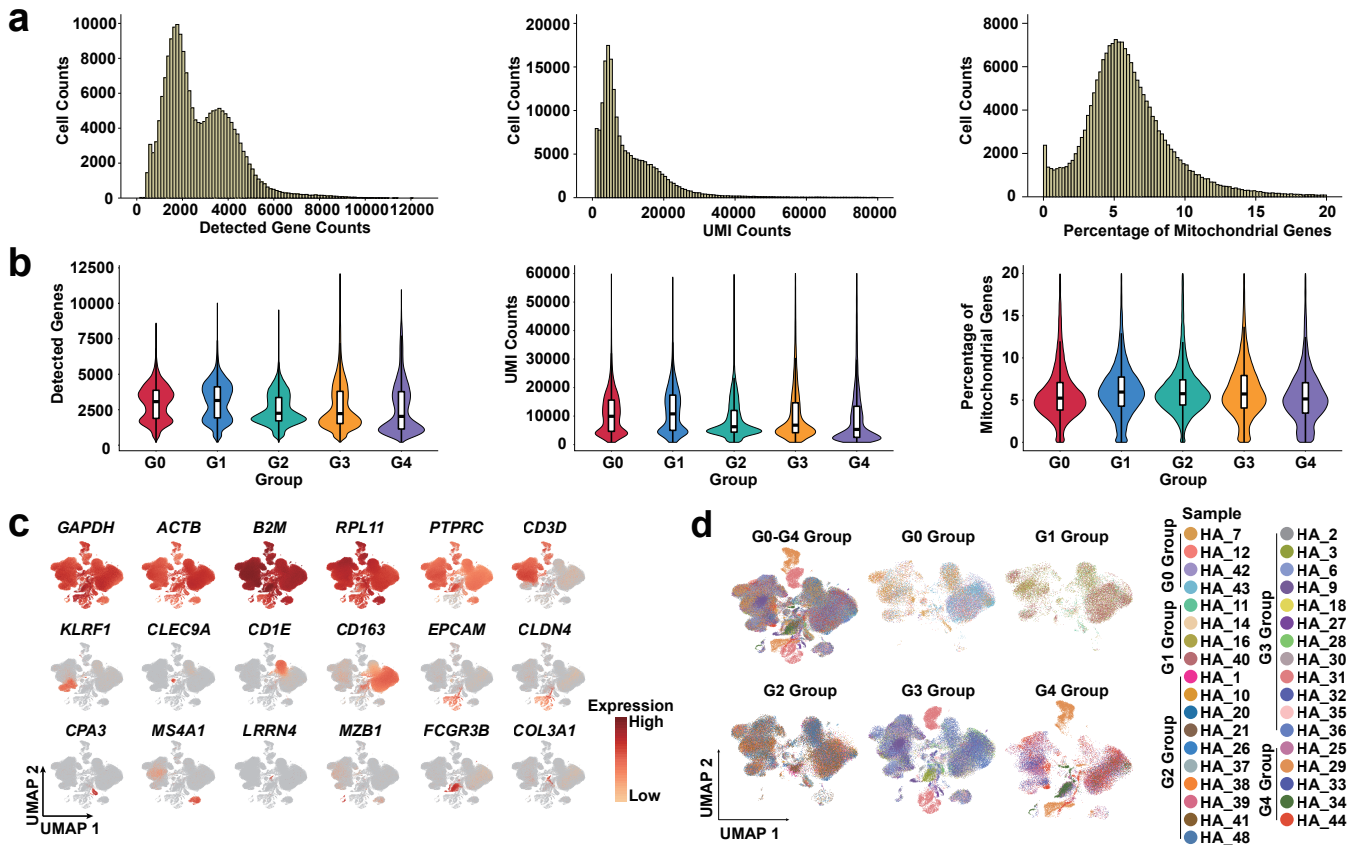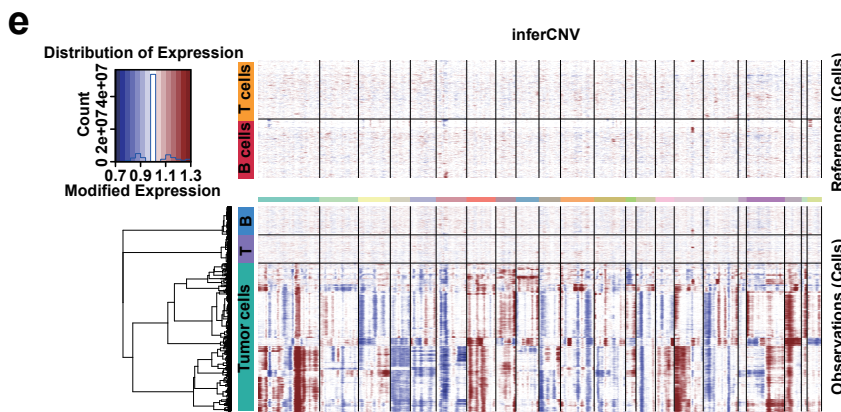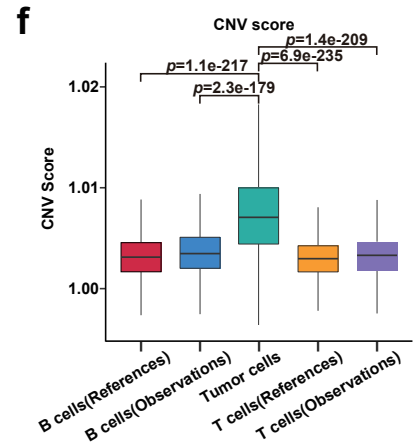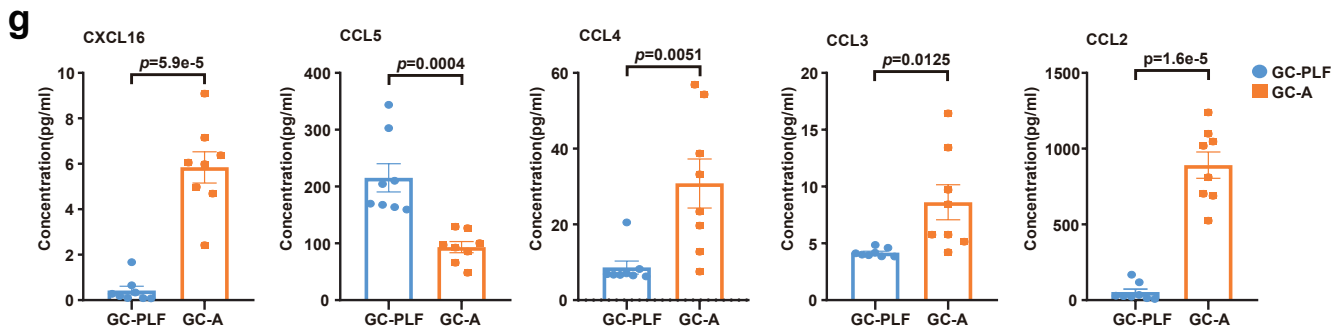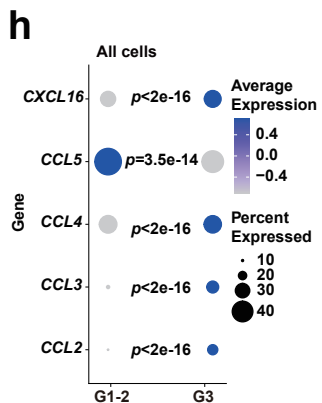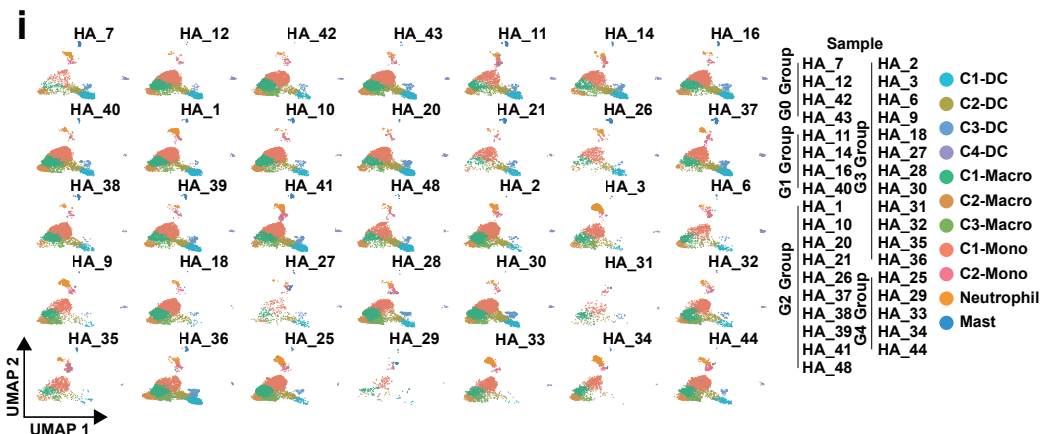

### **Supplementary Fig. 1. scRNA-seq profiles of cells identified in the peritoneal ecosystem**

(a) Histogram showing the distributions of detected gene counts, unique molecular identifier (UMI) counts, and percentage of mitochondrial genes per cell.

(b) Violin plots showing the distributions of detected genes, UMI counts and percentage of mitochondrial genes for cells in G0-G4 Groups (G0: n = 19581 cells; G1: n = 16768 cells; G2: n = 56153 cells; G3: n = 69648 cells; G4: n = 29837 cells). Box represents median  $\pm$  interquartile range; whiskers represent 1.5x interquartile range.

(c) Uniform Manifold Approximation and Projection (UMAP) plots indicating the expression of marker genes to annotate cell types.

(d) Uniform Manifold Approximation and Projection (UMAP) plot showing the cell type distribution in G0-G4 Groups. Each color represents a sample.

(e) Heatmap indicating chromosomal copy number variation (CNV) of T cells, B cells, and tumor cells. Upper panel shows the CNVs of 1000 random-selected T and B cells as reference cells. Lower panel shows the CNVs of another 1000 random-selected T and B cells for validation and all tumor cells for observation.

(f) Box plots showing CNV scores of T cells (n = 1000 cells) and B cells (n = 1000 cells) in references and observations, respectively, and tumor cells (n = 5235 cells). Box represents median  $\pm$  interquartile range; whiskers represent 1.5x interquartile range; the *p* values are calculated by two-sided unpaired Wilcoxon test.

(g) ELISA of chemokines in the gastric cancer ascites (GC-A, n = 8 samples) and gastric cancer peritoneal lavage fluids (GC-PLF, n = 8 samples). Data are presented as mean  $\pm$  SEM; the *p* values are calculated by two-sided unpaired Student's *t* test.

(h) Dotplots showing the expression levels of chemokine genes in all cells. Dot size represents percent of expressing cells in each group, color represents expression level of selected genes. G1-2: gastric cancer without peritoneal metastasis, as GC-PLF in (g); G3, gastric cancer with peritoneal metastasis, as GC-A in (g). *p* values are calculated by Wilcoxon test.

(i) UMAP plot showing the distribution of myeloid cells in G0-G4 Groups. Each color represents a cell type.

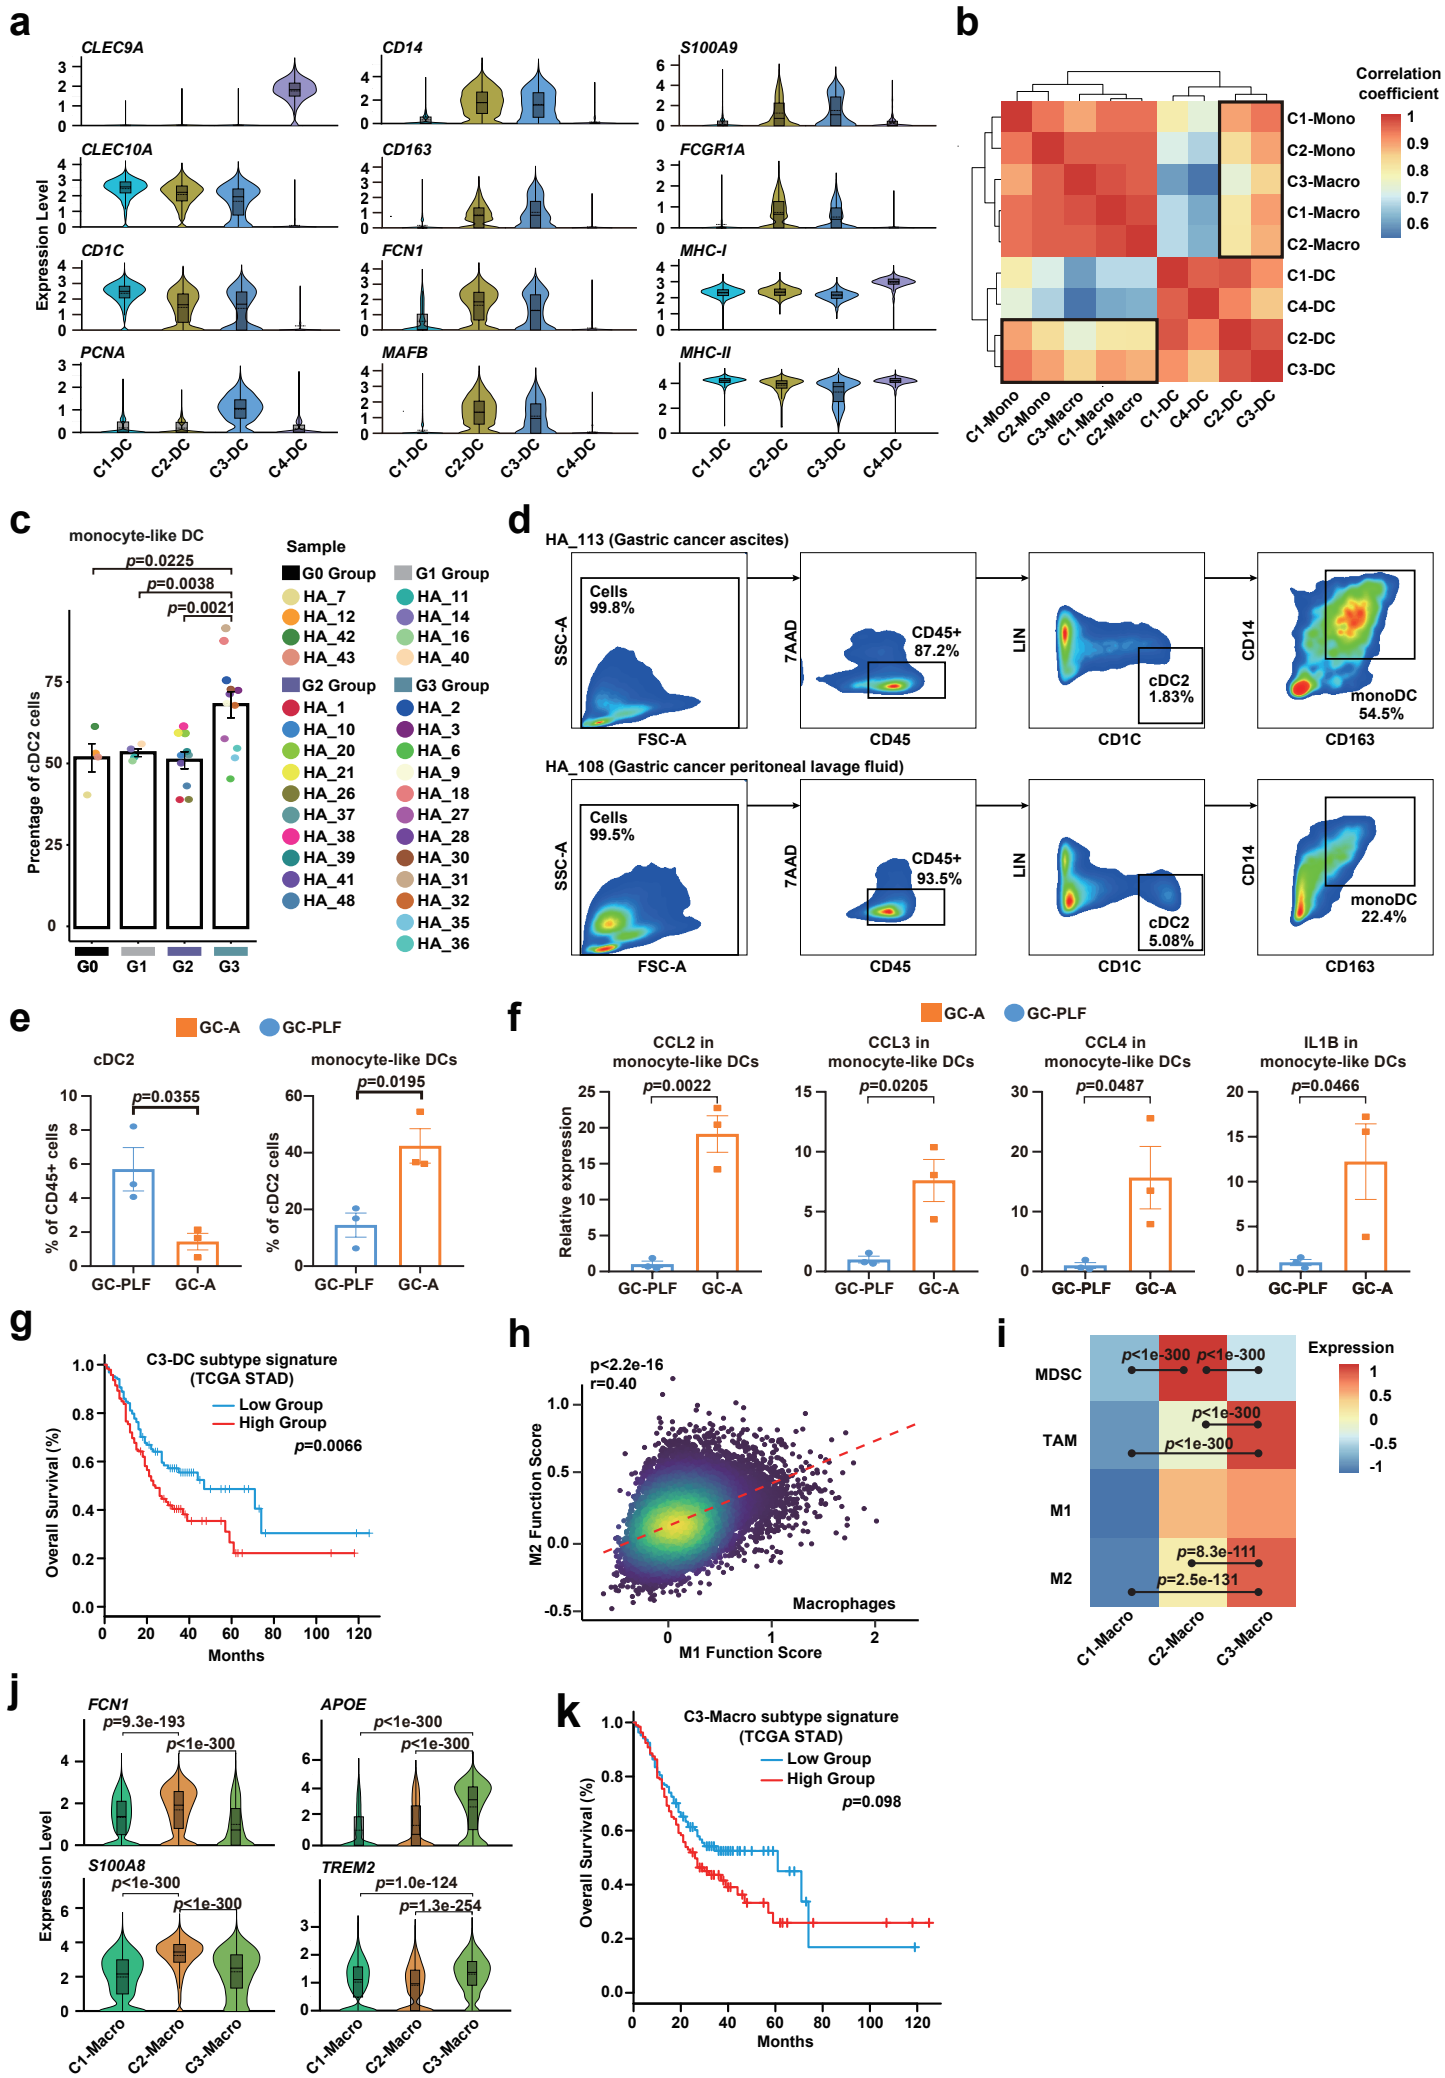

**Supplementary Fig. 2. Characteristics of myeloid cells in the peritoneal microenvironment during gastric cancer peritoneal metastasis**

(a) Violin plots showing the expression levels of selected marker genes in dendritic cell (DC) (C1-DC:  $n = 8753$  cells; C2-DC:  $n = 8430$  cells; C3-DC:  $n = 2173$  cells; C4-DC:  $n = 921$  cells), color-coded by cell type. Box represents median  $\pm$  interquartile range; whiskers represent 1.5x interquartile range; horizontal dotted line represents mean value.

(b) Heatmap showing the correlation between myeloid subtypes. Black boxes highlight the C2/C3-DC sharing with monocyte-lineage features.

(c) The proportion of monocyte-like DCs in different groups from G0 ( $n = 4$  samples), G1 ( $n = 4$  samples), G2 ( $n = 10$  samples) and G3 ( $n = 12$  samples) Group. Each color represents a sample. Data are presented as mean values  $\pm$  SEM (error bars); the  $p$  values are calculated by two-sided unpaired Student's  $t$  test.

(d) FACS strategy of monocyte-like DCs from gastric cancer ascites and gastric cancer peritoneal lavage fluids.

(e) Bar plots showing the proportions of cDC2 in CD45<sup>+</sup> cells (Left) and monocyte-like DCs in cDC2 (Right) between gastric cancer ascites (GC-A,  $n = 3$  independent experiments) and gastric cancer peritoneal lavage fluids (GC-PLF,  $n = 3$  independent experiments). Data are presented as mean values  $\pm$  SEM (error bars); the  $p$  values are calculated by two-sided unpaired Student's  $t$  test.

(f) Bar plots showing qPCR results on chemokines for monocyte-like DCs between gastric cancer ascites (GC-A,  $n = 3$  independent experiments) and gastric cancer peritoneal lavage fluids (GC-PLF,  $n = 3$  independent experiments). Data are presented as mean values  $\pm$  SEM (error bars); the  $p$  values are calculated by two-sided unpaired Student's  $t$  test.

(g) Kaplan-Meier curve showing the overall survival of patients from The Cancer Genome Atlas Stomach Adenocarcinoma (TCGA STAD) database based on the expression level of the C3-DC signature.  $p$  value is calculated by log-rank test.

(h) Scatter plots showing the correlation between M1 and M2 function score in macrophages.  $p$  value is calculated by Pearson correlation test.

(i) Heatmap indicating the expression levels of specific gene signatures in macrophage subtypes. Macro, macrophage.  $p$  values are calculated by Wilcoxon test.

(j) Violin plots indicating the expression levels of *FCN1*, *APOE*, *S100A8* and *TREM2* genes in macrophage types (C1-Macro:  $n = 16571$  cells; C2-Macro:  $n = 9995$  cells; C3-Macro:  $n = 6323$  cells). Box represents median  $\pm$  interquartile range; whiskers represent 1.5x interquartile range; horizontal dotted line represents mean value. The  $p$  values are calculated by Wilcoxon test.

(k) The overall survival of TCGA STAD patients with high or low expression group of the C3-Macro subtype signature.  $p$  value is calculated by log-rank test.

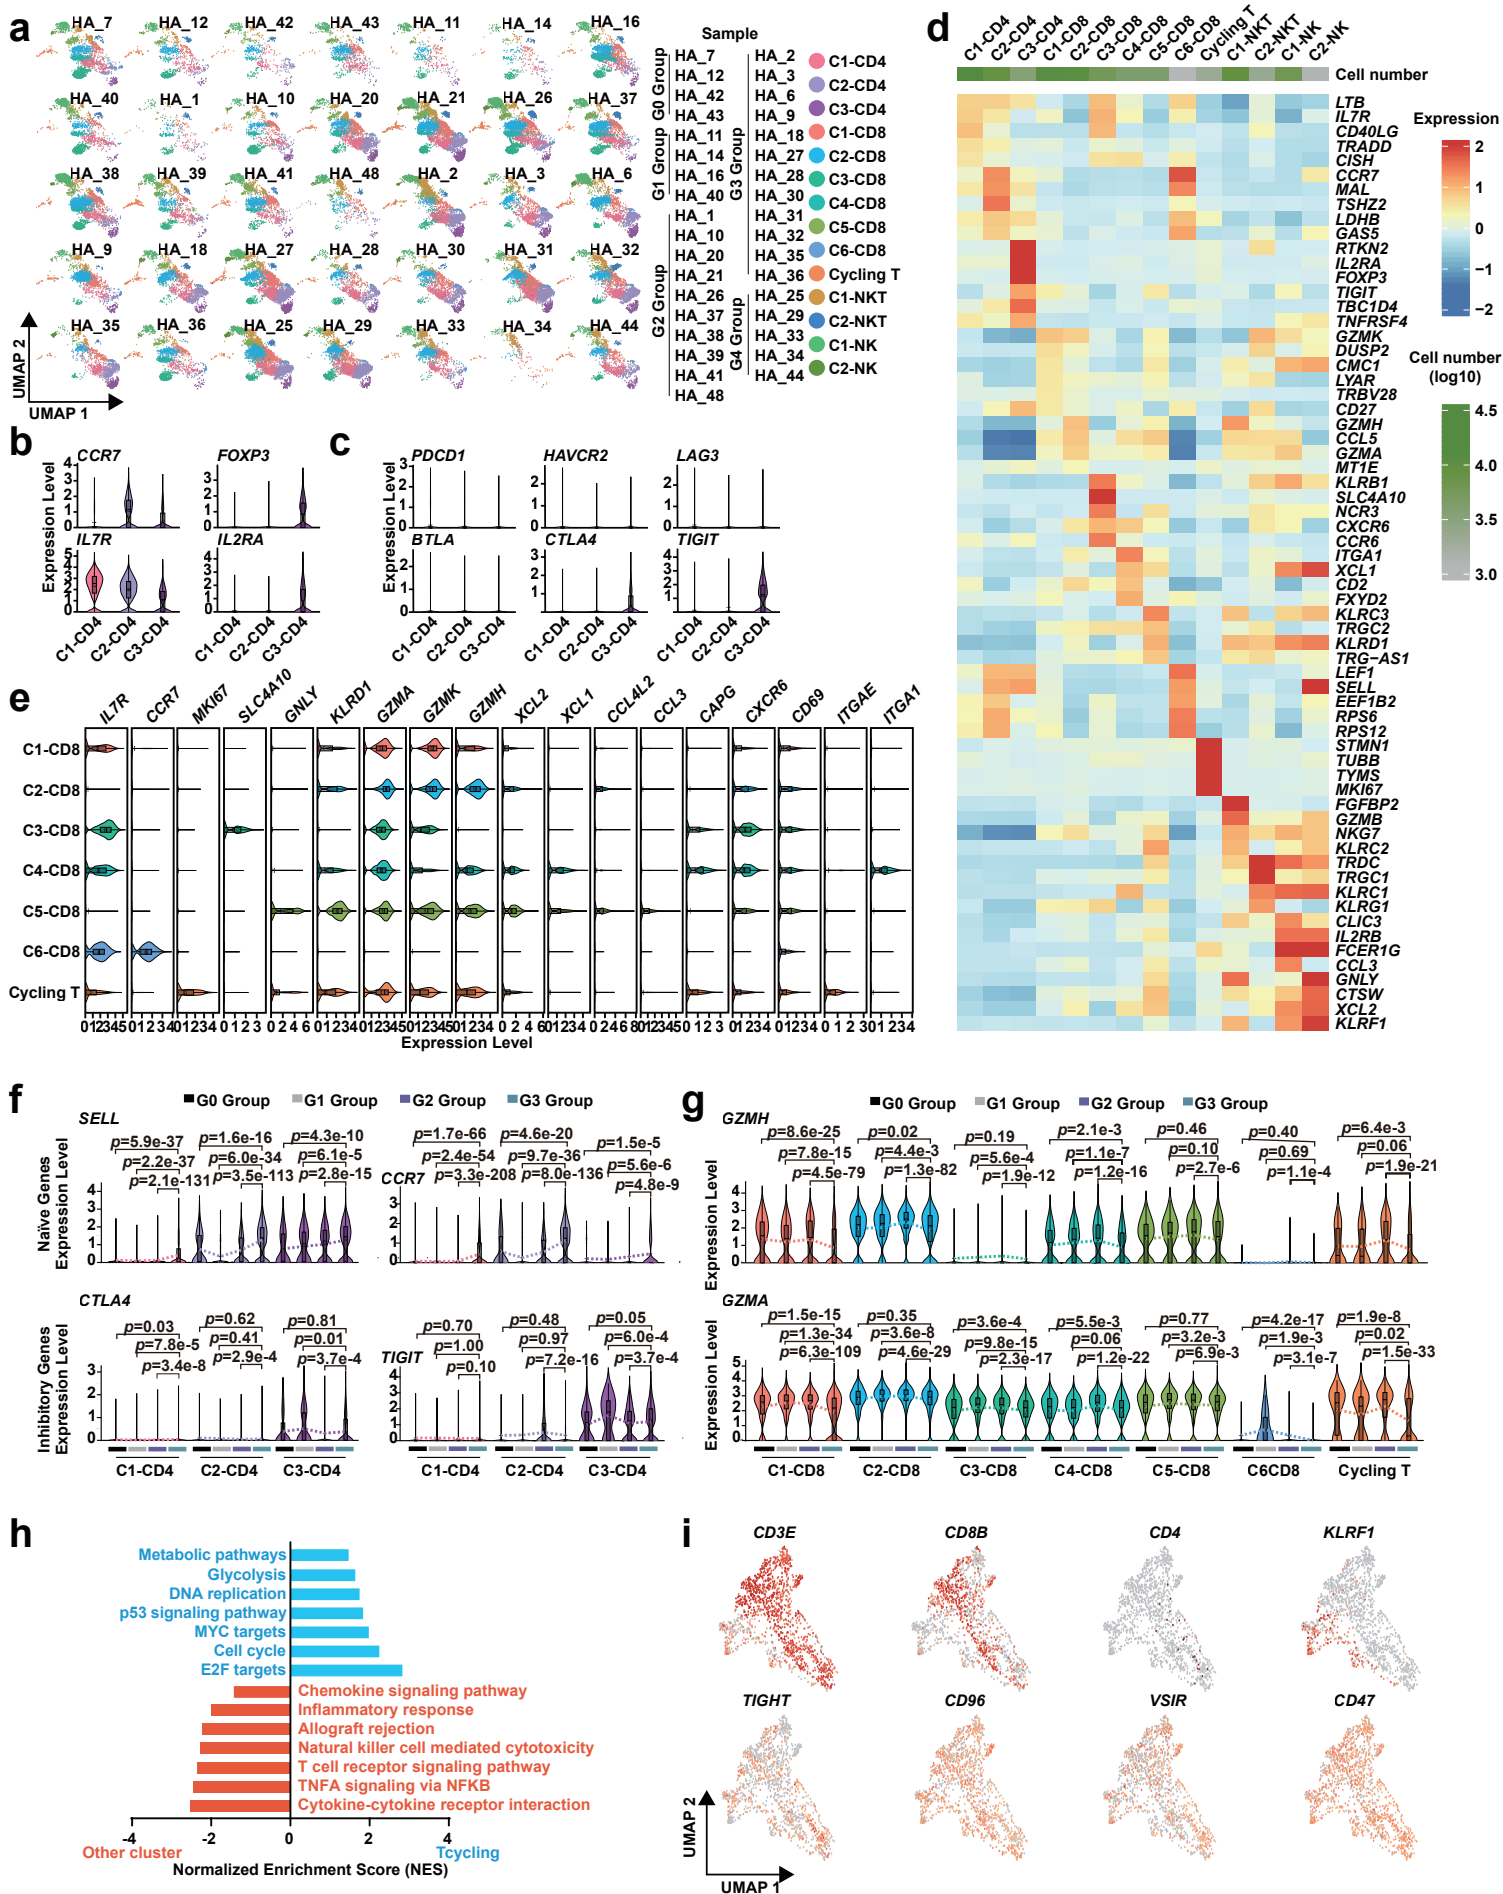

**Supplementary Fig. 3. Characteristics of T cells in the peritoneal microenvironment during gastric cancer peritoneal metastasis**

(a) Uniform Manifold Approximation and Projection (UMAP) plot showing the distribution of T/NK cells in different groups. Each color represents a cell type.

(b, c) Violin plots showing expression levels of marker genes (b) and inhibitory genes (c) in CD4 subtypes (C1-CD4: n = 12855 cells; C2-CD4: n = 8528 cells; C3-CD4: n = 3485 cells). Box represents median  $\pm$  interquartile range; whiskers represent 1.5x interquartile range; horizontal dotted line represents mean value.

(d) Heatmap plot indicating expression levels of selected genes among T/NK cell types. Expression level is projected by color: red represents high expression and blue represents low expression.

(e) Violin plots of selected marker genes (columns) for CD8 T cell subsets and cycling T cells (rows) (C1-CD8: n = 11021 cells; C2-CD8: n = 10285 cells; C3-CD8: n = 5623 cells; C4-CD8: n = 4025 cells; C5-CD8: n = 4007 cells; Cycling T: n = 1404 cells).

(f) Violin plot showing expression levels of selected naïve and inhibitory genes in CD4 T cells in G0 (n = 4 samples), G1 (n = 4 samples), G2 (n = 10 samples) and G3 (n = 12 samples) Group. Horizontal dotted line represents mean value. Box represents median  $\pm$  interquartile range; whiskers represent 1.5x interquartile range; the *p* values are calculated by two-sided unpaired Wilcoxon test.

(g) Violin plot showing expression levels of selected cytotoxic genes in CD8 T cell types and cycling T cells in G0 (n = 4 samples), G1 (n = 4 samples), G2 (n = 10 samples) and G3 (n = 12 samples) Group. Horizontal dotted line represents mean value. Box represents median  $\pm$  interquartile range; whiskers represent 1.5x interquartile range; the *p* values are calculated by two-sided unpaired Wilcoxon test.

(h) Bar chart showing the normalized enrichment score (NES) of specific pathways enriched in cycling T (blue lines) and other CD8 T cells (red lines) based on Gene Set Enrichment Analyses (GSEA) analysis.

(i) Uniform Manifold Approximation and Projection (UMAP) plots indicating the expression of selected marker genes to determine cycling T subtypes.

**a**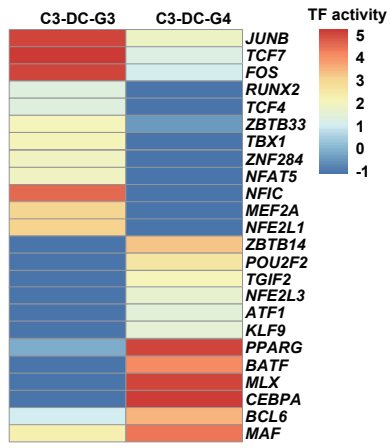**b**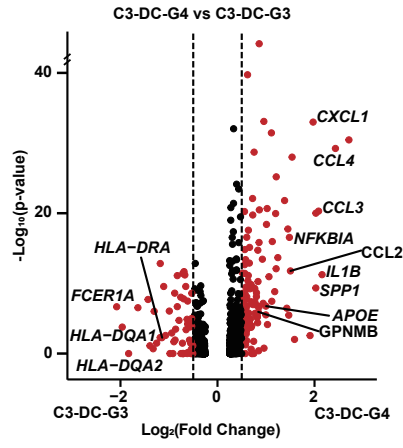**c**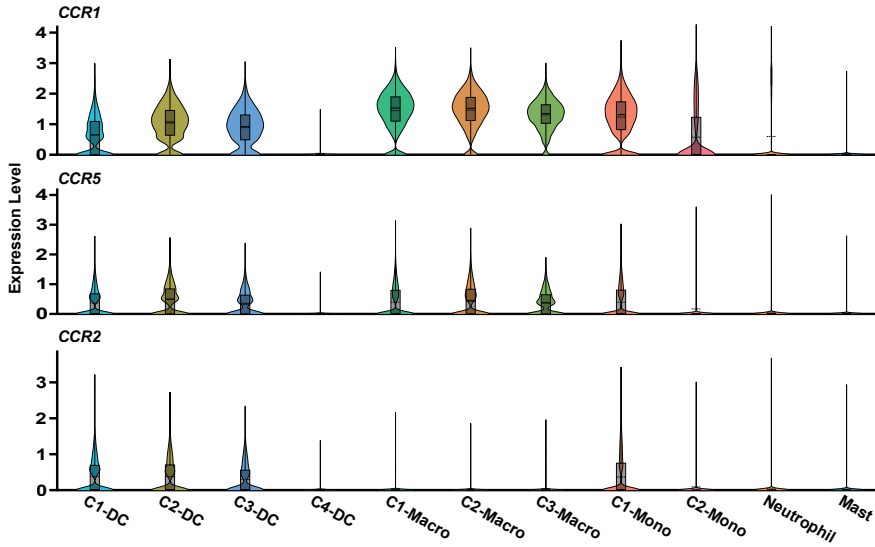**d**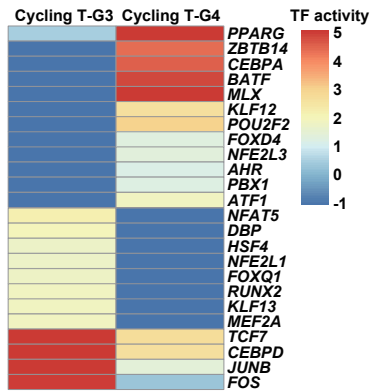**e**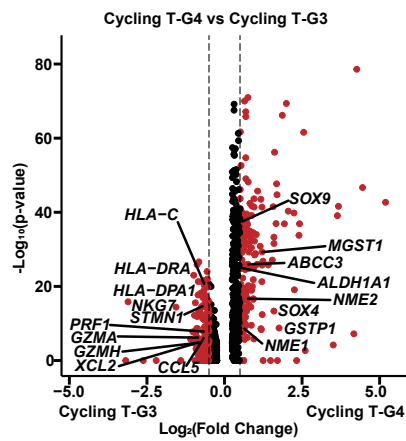



**Supplementary Fig. 4. Distinct states of monocyte-like DC and cycling T cells in therapy-naïve and therapy groups**

(a) Heatmap showing transcription factor (TF) activity of C3-DC in the G3 and G4 Groups using SCENIC analysis.

(b) Volcano plot showing differentially expressed genes between C3-DC in the G3 and G4 Groups.

(c) Violin plots indicating expression levels of chemokine receptors in myeloid cells (C1-DC: n = 8753 cells; C2-DC: n = 8430 cells; C3-DC: n = 2173 cells; C4-DC: n = 921 cells; C1-Macro: n = 16571 cells; C2-Macro: n = 9995 cells; C3-Macro: n = 6323 cells; C1-Mono: n = 35729 cells; C2-Mono: n = 3682 cells; Neutrophil: n = 6602 cells; Mast: n = 1504 cells). Box represents median  $\pm$  interquartile range; whiskers represent 1.5x interquartile range; horizontal dotted line represents mean value. DC, dendritic cell; Macro, macrophage; Mono, monocyte.

(d) Heatmap showing TF activity of cycling T cells in the G3 (n = 531 cells) and G4 (n = 137 cells) Groups using SCENIC analysis.

(e) Volcano plot showing differentially expressed genes between cycling T cells in the G3 and G4 Groups.

**a**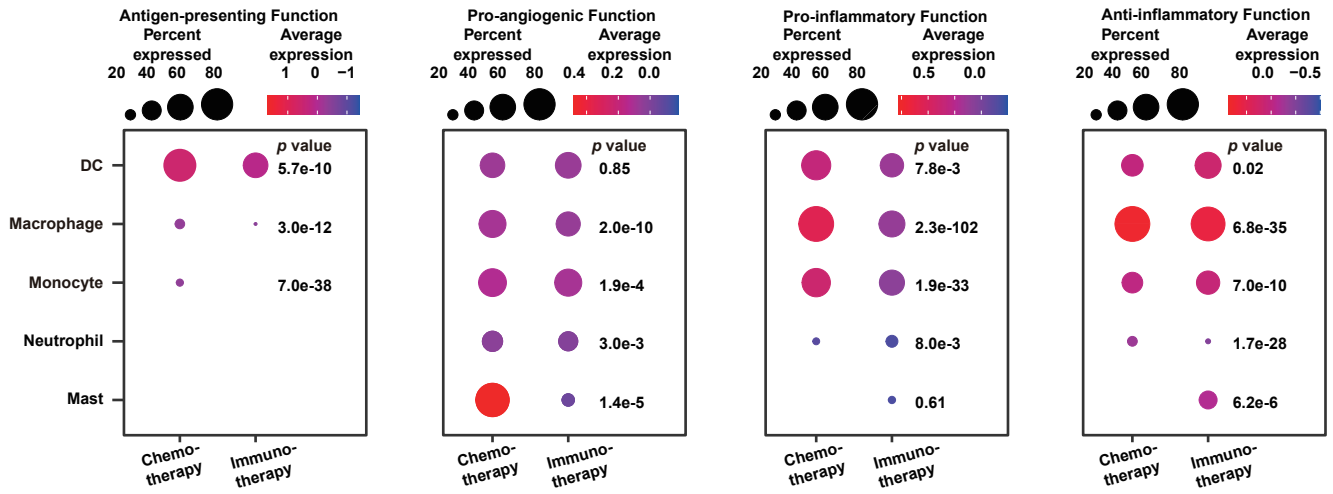**b**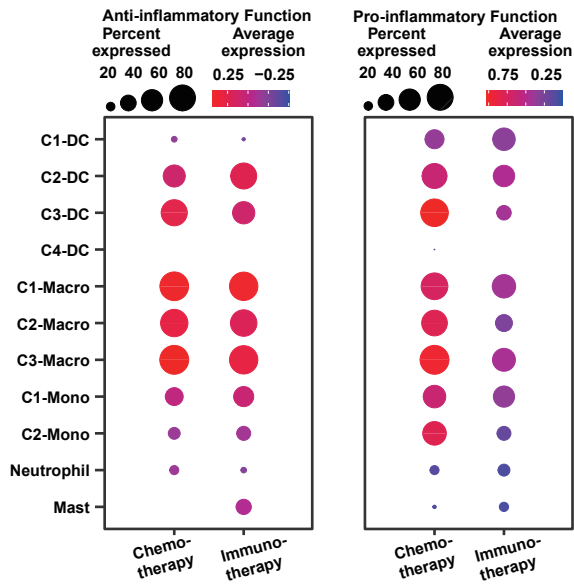**c**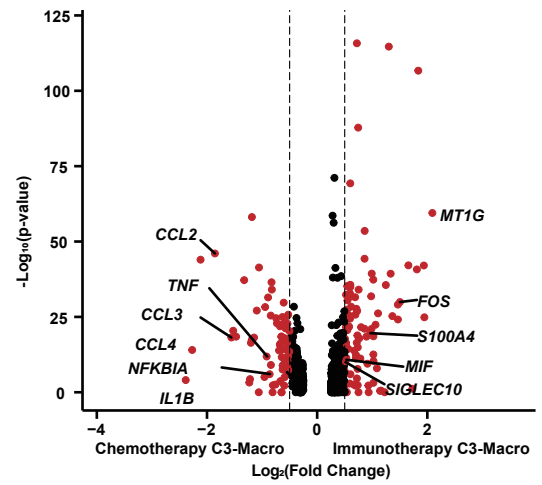**d**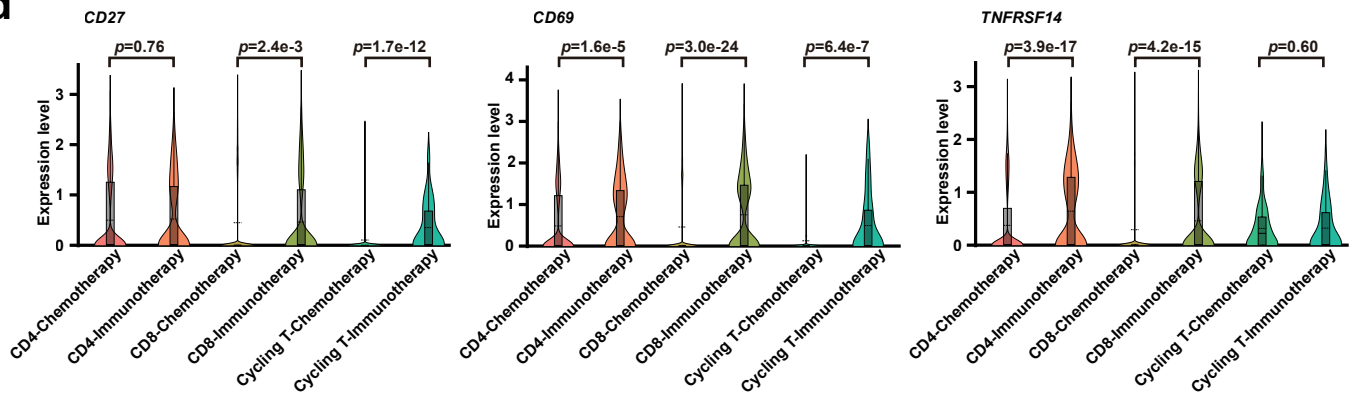**e**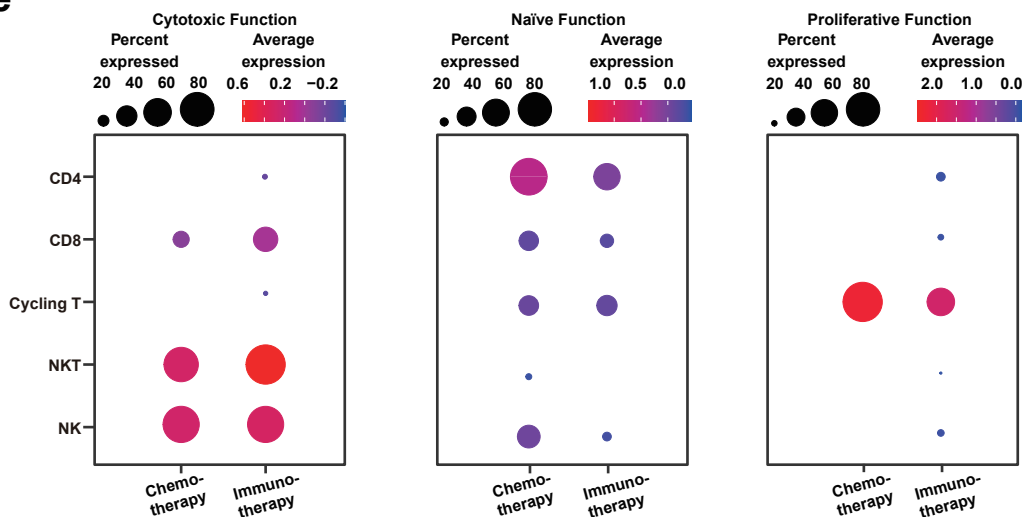

**Supplementary Fig. 5. Immune phenotype evolution of monocyte-like DC and cycling T cells after immunotherapy**

(a) Dotplots showing the cell expression percentage (dot size) and related function scores (dot color) of antigen-presenting, pro-angiogenic, pro-inflammatory, and anti-inflammatory function scores in main myeloid subtypes in the Chemotherapy (three patients) and Immunotherapy (two patients) groups. DC, dendritic cell. *p* values are calculated by two-sided unpaired Wilcoxon test.

(b) Similar to (a), dotplots showing anti-inflammatory and pro-inflammatory function scores of myeloid subtypes in Chemotherapy (three patients) and Immunotherapy (two patients) groups. DC, dendritic cell; Macro, macrophage; Mono, monocyte.

(c) Volcano plot showing differentially expressed genes of C3-Macro cells between the Chemotherapy (three patients) and Immunotherapy (two patients) groups.

(d) Violin plot showing expression levels of co-stimulatory markers of T cells in the Chemotherapy (three patients) and Immunotherapy (two patients) groups. Box represents median  $\pm$  interquartile range; whiskers represent 1.5x interquartile range; horizontal dotted line represents mean value. *p* values are calculated by two-sided unpaired Wilcoxon test.

(e) Similar to (a), dotplots showing the cytotoxic, naïve, and proliferative function scores of main T/NK cell clusters in the Chemotherapy (three patients) and Immunotherapy (two patients) groups.

Source data are provided as a Source Data file.

**a**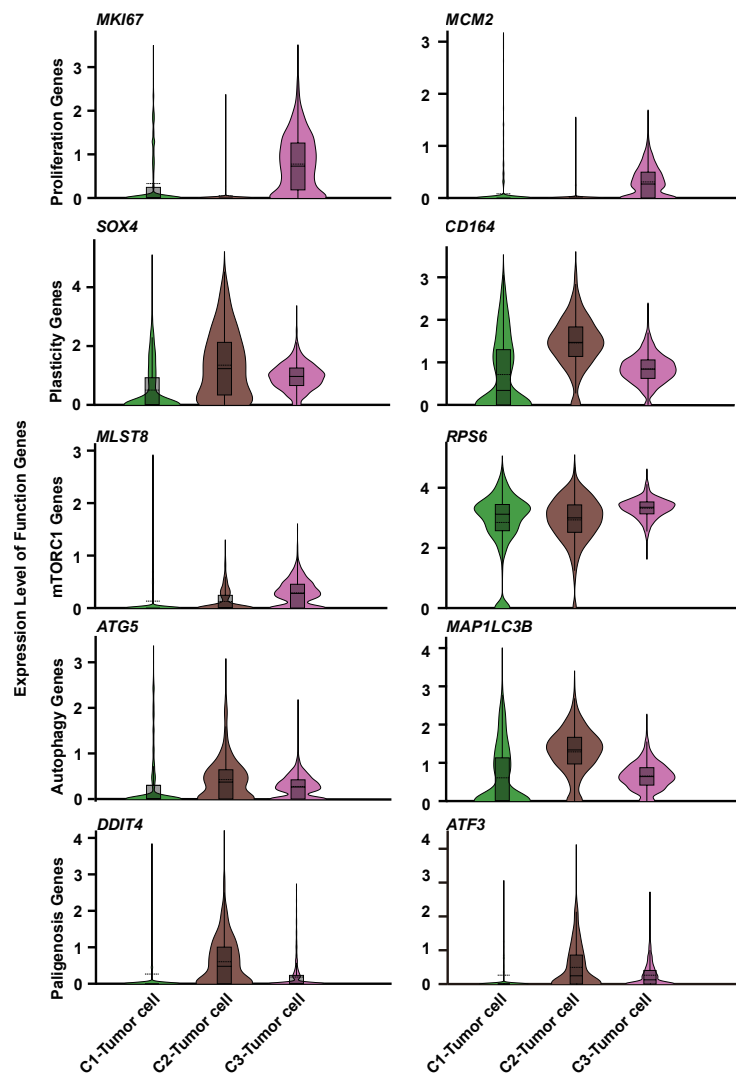**b**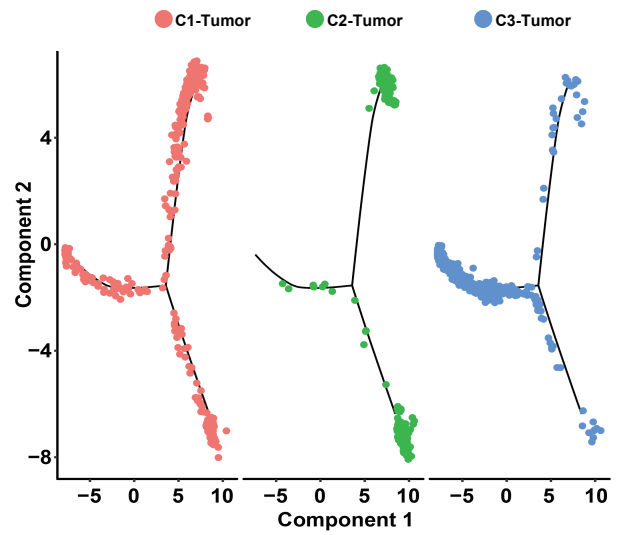**c**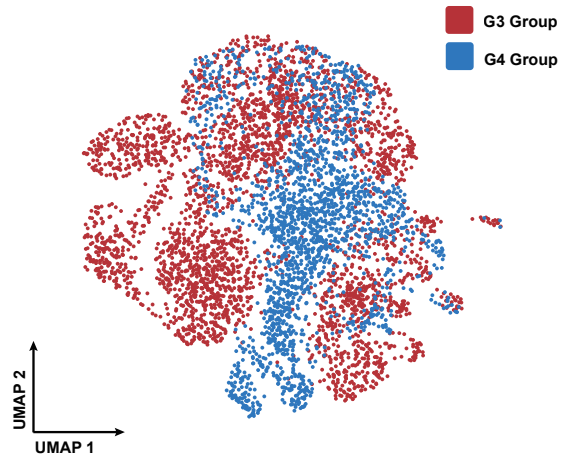**d**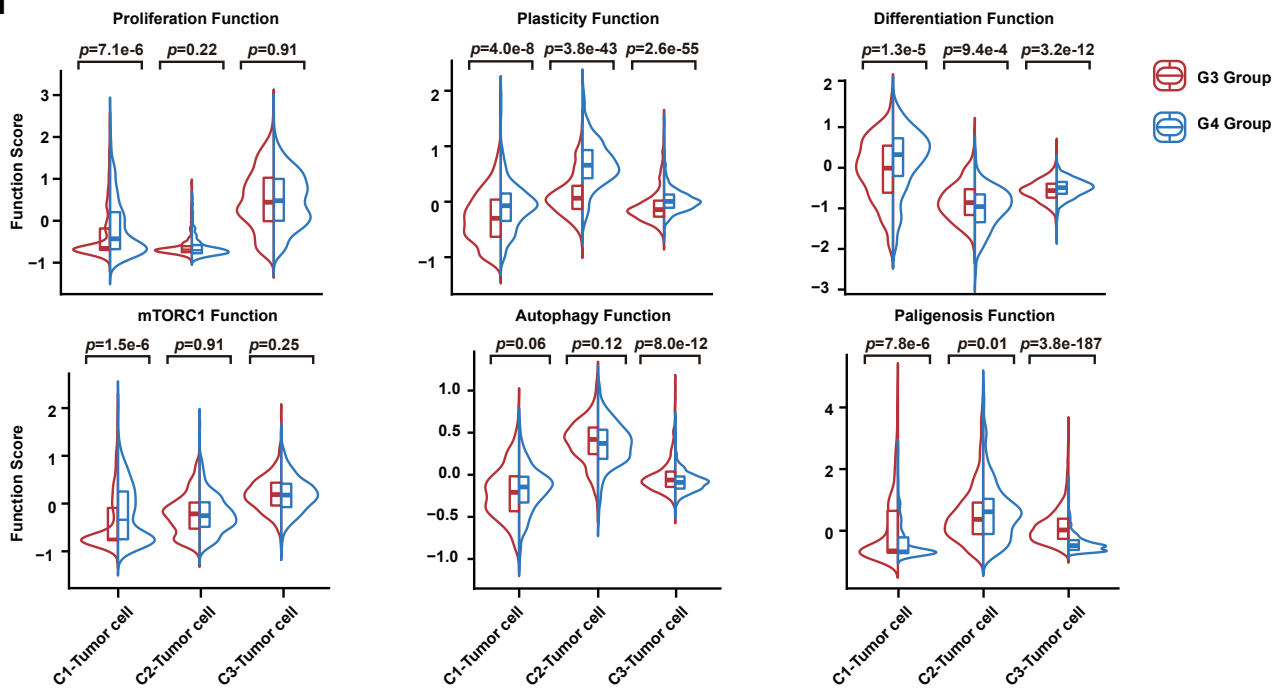

**Supplementary Fig. 6. Characteristics of tumor cells in the peritoneal microenvironment during gastric cancer peritoneal metastasis**

(a) Violin plots showing expression levels of function-related genes, including proliferation, plasticity, mTORC1, autophagy, and paligenosis genes, in tumor subtypes (C1-Tumor cell: n = 713 cells; C2-Tumor cell: n = 549 cells; C3-Tumor cell: n = 2545 cells). Box represents median  $\pm$  interquartile range; whiskers represent 1.5x interquartile range; horizontal dotted line represents mean value.

(b) Transition trajectories of tumor cell subtypes along pseudotime. Each dot corresponds to a single cell.

(c) Uniform Manifold Approximation and Projection (UMAP) plot showing the distribution of tumor cells in G3 (Red) and G4 (blue) Groups.

(d) Split violin plots representing function scores of proliferation, plasticity, differentiation, mTORC1, autophagy, and paligenosis for tumor cell subtypes in the G3 (red) and G4 (blue) Groups. Box represents median  $\pm$  interquartile range; *p* values are calculated by Wilcoxon test.

Source data are provided as a Source Data file.

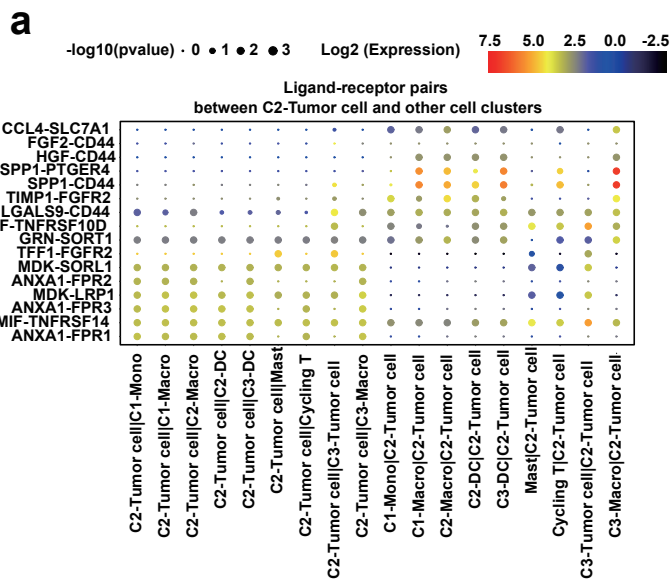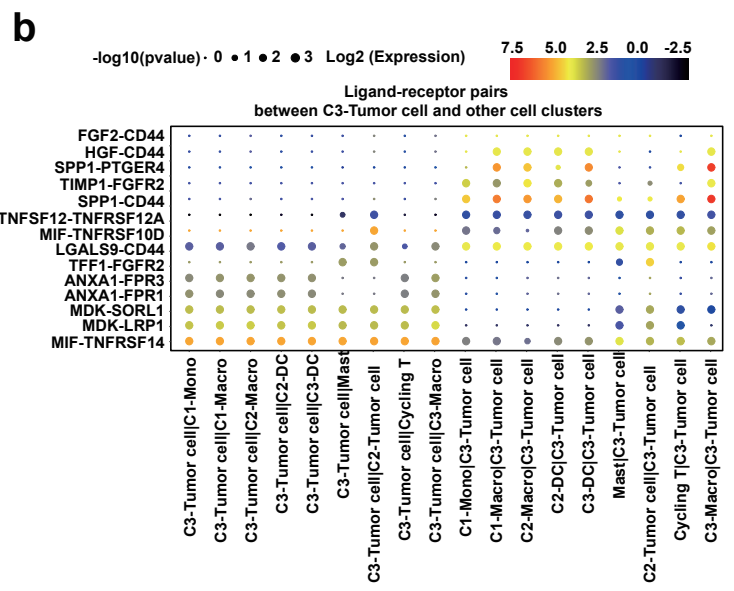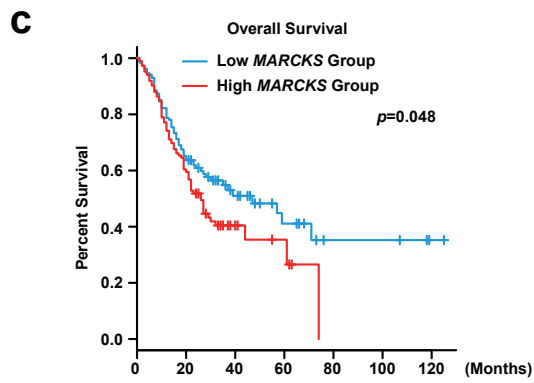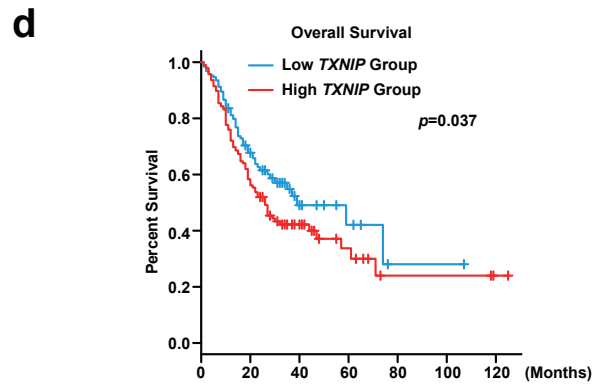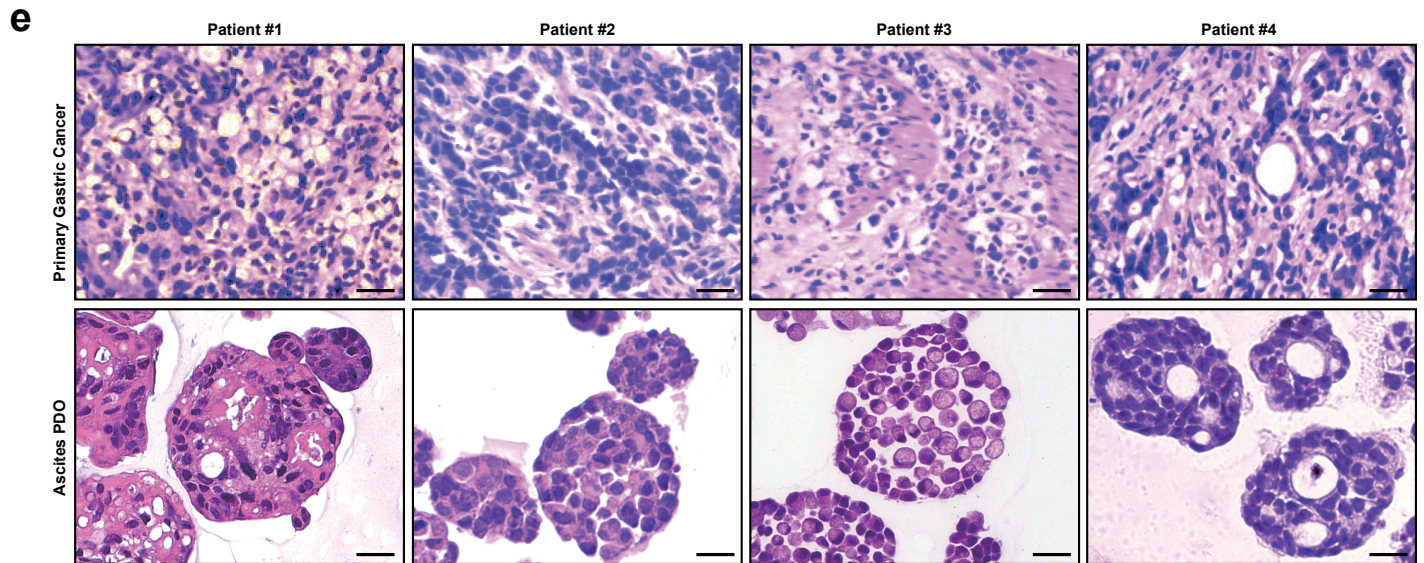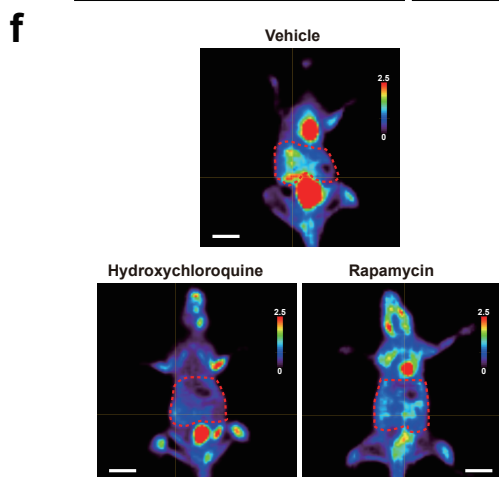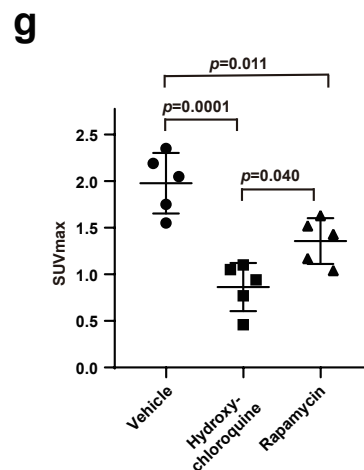

**Supplementary Fig. 7. Characteristics of tumor cell involved in paligenosis and gastric cancer patient-derived organoids**

(a,b) Dotplot showing intercellular interaction between C2-Tumor cell (a) and C3-Tumor cell (b) and immune cell subtypes, based on ligand-receptor pairs by CellPhoneDB analysis. Dot size represents the significance of the interactions and dot color represents expression levels.

(c,d) Kaplan-Meier curves showing the overall survival of patients from The Cancer Genome Atlas Stomach Adenocarcinoma (TCGA-STAD) database with high (red line) or low (blue line) expression group of *MARCKS* (c) and *TXNIP* (d), respectively. *p* value is calculated by log-rank test.

(e) Hematoxylin-eosin staining for matched patient biopsies (top) and patient-derived organoid from ascites (bottom), showing that the organoids maintain the growth patterns and differentiation of the primary gastric cancer. Scale bars, 100  $\mu$ m.

(f) <sup>18</sup>F-FDG PET images of mice at the five weeks after intraperitoneal injection with PDOs. Scale bar, 2cm.

(g) Quantification of SUVmax in patient-derived organoid xenograft (PDOX) as in (f) (n = 5 mice in each group). Data are presented as mean values  $\pm$  SEM (error bars); *p* values are calculated by one-way ANOVA with Tukey post hoc test.

## Supplementary Table and Supplementary Table Legends



**Supplementary Table 1. Summary of scRNA-seq patient sample information.**

| Patient ID | Age(years) | Sex    | Group | Sample type                    | Pathologic AJCC stage | Therapeutic history         |
|------------|------------|--------|-------|--------------------------------|-----------------------|-----------------------------|
| HA_7       | 42-66      | Female | G0    | Normal peritoneal lavage fluid | N/A*                  | Treatment-naïve             |
| HA_12      | 42-66      | Female | G0    | Normal peritoneal lavage fluid | N/A*                  | Treatment-naïve             |
| HA_42      | 42-66      | Female | G0    | Normal peritoneal lavage fluid | N/A*                  | Treatment-naïve             |
| HA_43      | 42-66      | Female | G0    | Normal peritoneal lavage fluid | N/A*                  | Treatment-naïve             |
| HA_11      | 38-63      | Male   | G1    | Peritoneal lavage fluid        | pT1bN0M0, IA          | Treatment-naïve             |
| HA_14      | 38-63      | Male   | G1    | Peritoneal lavage fluid        | pT1aN0M0, IA          | Treatment-naïve             |
| HA_16      | 38-63      | Male   | G1    | Peritoneal lavage fluid        | pT1aN0M0, IA          | Treatment-naïve             |
| HA_40      | 38-63      | Female | G1    | Peritoneal lavage fluid        | pT1aN0M0, IA          | Treatment-naïve             |
| HA_1       | 52-84      | Male   | G2    | Peritoneal lavage fluid        | pT2N2M0, IIB          | Treatment-naïve             |
| HA_10      | 52-84      | Male   | G2    | Peritoneal lavage fluid        | pT3N1M0, IIB          | Treatment-naïve             |
| HA_20      | 52-84      | Male   | G2    | Peritoneal lavage fluid        | pT3N2M0, IIIA         | Treatment-naïve             |
| HA_21      | 52-84      | Male   | G2    | Peritoneal lavage fluid        | pT4aN1M0, IIIA        | Treatment-naïve             |
| HA_26      | 52-84      | Male   | G2    | Peritoneal lavage fluid        | pT3N0M0, IIA          | Treatment-naïve             |
| HA_37      | 52-84      | Male   | G2    | Peritoneal lavage fluid        | pT4aN2M0, IIIA        | Treatment-naïve             |
| HA_38      | 52-84      | Female | G2    | Peritoneal lavage fluid        | pT3N3aM0, IIIB        | Treatment-naïve             |
| HA_39      | 52-84      | Male   | G2    | Peritoneal lavage fluid        | pT4aN2M0, IIIA        | Treatment-naïve             |
| HA_41      | 52-84      | Male   | G2    | Peritoneal lavage fluid        | pT2N0M0, IB           | Treatment-naïve             |
| HA_48      | 52-84      | Male   | G2    | Peritoneal lavage fluid        | pT3N1M0, IIB          | Treatment-naïve             |
| HA_2       | 36-81      | Male   | G3    | Ascites                        | N/A*                  | Treatment-naïve             |
| HA_3       | 36-81      | Male   | G3    | Ascites                        | N/A*                  | Treatment-naïve             |
| HA_6       | 36-81      | Male   | G3    | Ascites                        | N/A*                  | Treatment-naïve             |
| HA_9       | 36-81      | Male   | G3    | Ascites                        | N/A*                  | Treatment-naïve             |
| HA_18      | 36-81      | Female | G3    | Ascites                        | N/A*                  | Treatment-naïve             |
| HA_27      | 36-81      | Male   | G3    | Ascites                        | N/A*                  | Treatment-naïve             |
| HA_28      | 36-81      | Female | G3    | Ascites                        | N/A*                  | Treatment-naïve             |
| HA_30      | 36-81      | Female | G3    | Ascites                        | N/A*                  | Treatment-naïve             |
| HA_31      | 36-81      | Female | G3    | Ascites                        | N/A*                  | Treatment-naïve             |
| HA_32      | 36-81      | Male   | G3    | Ascites                        | N/A*                  | Treatment-naïve             |
| HA_35      | 36-81      | Male   | G3    | Ascites                        | N/A*                  | Treatment-naïve             |
| HA_36      | 36-81      | Mele   | G3    | Ascites                        | N/A*                  | Treatment-naïve             |
| HA_25      | 46-83      | Female | G4    | Ascites                        | N/A*                  | S-1+Paclitaxel              |
| HA_29      | 46-83      | Male   | G4    | Ascites                        | N/A*                  | S-1+Paclitaxel+Apatinib     |
| HA_33      | 46-83      | Female | G4    | Ascites                        | N/A*                  | S-1+Atezolizumab            |
| HA_34      | 46-83      | Male   | G4    | Ascites                        | N/A*                  | S-1+Oxaliplatin+Toripalimab |
| HA_44      | 46-83      | Female | G4    | Ascites                        | N/A*                  | S-1+Oxaliplatin             |

N/A\*: Not applicable due to benign hysteromyoma or gastric cancer peritoneal metastasis without surgery, age as a range for each patient within each group.

**Supplementary Table 2. Summary of scRNA-seq transcriptomic profiles.**

| <b>Sample</b> | <b>Group</b> | <b>Cell counts per sample</b> | <b>Median genes per cell</b> | <b>Median counts per cell</b> | <b>UMI</b> | <b>Mitochondrial genes per cell (%)</b> |
|---------------|--------------|-------------------------------|------------------------------|-------------------------------|------------|-----------------------------------------|
| HA_7          | G0           | 4689                          | 2010                         | 5006                          |            | 5.58                                    |
| HA_12         | G0           | 4746                          | 3177                         | 10412                         |            | 4.25                                    |
| HA_42         | G0           | 4111                          | 3913                         | 14720                         |            | 6.47                                    |
| HA_43         | G0           | 6035                          | 3205                         | 10927                         |            | 6.50                                    |
| HA_11         | G1           | 2707                          | 3028                         | 9961                          |            | 4.34                                    |
| HA_14         | G1           | 2689                          | 4057                         | 18129                         |            | 6.41                                    |
| HA_16         | G1           | 5483                          | 2390                         | 6962                          |            | 6.16                                    |
| HA_40         | G1           | 5889                          | 3675                         | 13036                         |            | 6.92                                    |
| HA_1          | G2           | 5393                          | 2321                         | 6389                          |            | 7.33                                    |
| HA_10         | G2           | 6099                          | 2954                         | 8847                          |            | 7.02                                    |
| HA_20         | G2           | 5680                          | 2030                         | 6703.5                        |            | 5.56                                    |
| HA_21         | G2           | 6423                          | 1867                         | 5096                          |            | 6.08                                    |
| HA_26         | G2           | 5926                          | 1996.5                       | 5126.5                        |            | 4.99                                    |
| HA_37         | G2           | 5699                          | 2217                         | 6060                          |            | 5.63                                    |
| HA_38         | G2           | 5957                          | 2368                         | 6313                          |            | 5.51                                    |
| HA_39         | G2           | 4456                          | 2969                         | 9866.5                        |            | 7.08                                    |
| HA_41         | G2           | 6341                          | 2832                         | 8706                          |            | 5.82                                    |
| HA_48         | G2           | 4179                          | 3352                         | 13019                         |            | 6.18                                    |
| HA_2          | G3           | 8844                          | 1731.5                       | 5823.5                        |            | 8.62                                    |
| HA_3          | G3           | 5018                          | 2056                         | 6740                          |            | 5.04                                    |
| HA_6          | G3           | 5130                          | 1931                         | 6295                          |            | 5.29                                    |
| HA_9          | G3           | 4796                          | 2008                         | 6045.5                        |            | 4.51                                    |
| HA_18         | G3           | 5038                          | 2430.5                       | 7579.5                        |            | 5.81                                    |
| HA_27         | G3           | 5320                          | 2172                         | 6054.5                        |            | 5.08                                    |
| HA_28         | G3           | 6066                          | 3890                         | 15862.5                       |            | 5.54                                    |
| HA_30         | G3           | 6470                          | 2674                         | 7387                          |            | 6.26                                    |
| HA_31         | G3           | 6480                          | 1603                         | 4834.5                        |            | 6.69                                    |
| HA_32         | G3           | 5933                          | 2062                         | 6945                          |            | 4.88                                    |
| HA_35         | G3           | 3406                          | 1989                         | 5888                          |            | 5.03                                    |
| HA_36         | G3           | 7147                          | 3655                         | 14717                         |            | 8.78                                    |
| HA_25         | G4           | 12655                         | 1790                         | 5030                          |            | 4.36                                    |
| HA_29         | G4           | 5786                          | 1442.5                       | 4004                          |            | 6.60                                    |
| HA_33         | G4           | 3658                          | 1972                         | 5222                          |            | 5.43                                    |
| HA_34         | G4           | 2701                          | 1702                         | 4173                          |            | 4.23                                    |
| HA_44         | G4           | 5037                          | 3141                         | 10494                         |            | 7.72                                    |

UMI: Unique Molecular Identifier

**Supplementary Table 3. Summary of PDOs sample information.**

| <b>Patient ID</b> | <b>Age</b> | <b>Gender</b> | <b>Sample type</b> | <b>AJCC stage</b> |
|-------------------|------------|---------------|--------------------|-------------------|
| PDO#1             | 57-83      | Male          | Ascites            | N/A*              |
| PDO#2             | 57-83      | Male          | Ascites            | T4N3bM1           |
| PDO#3             | 57-83      | Male          | Ascites            | N/A*              |
| PDO#4             | 57-83      | Female        | Ascites            | T3N3aM1           |

N/A\*: Not applicable due to gastric cancer peritoneal metastasis without surgery; PDOs: patient-derived organoids.

**Supplementary Table 4. Antibodies application and dilution**

| <b>Antibodies</b>                                                                           | <b>Company</b>                       | <b>Application</b> | <b>Dilution</b> |
|---------------------------------------------------------------------------------------------|--------------------------------------|--------------------|-----------------|
| Mouse Anti-TXNIP (JY2)                                                                      | Novus (NBP1-54578)                   | IF                 | 1:50            |
| Mouse Anti- $\beta$ -Tubulin                                                                | Cell Signaling Technology (2146S)    | IF                 | 1:200           |
| Rabbit Anti-MARCKS (D88D11)                                                                 | Cell Signaling Technology (5607S)    | IF                 | 1:100           |
| Rabbit Anti-LC3B                                                                            | Cell Signaling Technology (2775S)    | IF                 | 1:50            |
| Rabbit Anti-SOX9                                                                            | Merck (AB5535)                       | IF                 | 1:100           |
| Mouse Anti-SOX9                                                                             | Abcam (ab76997)                      | IF                 | 1:100           |
| Rabbit Anti-REDD1                                                                           | Proteintech (10638-1-AP)             | IF                 | 1:100           |
| Rabbit Anti-ATF3                                                                            | Sigma (HPA001562)                    | IF                 | 1:200           |
| Rabbit Anti-PS6 Ribosomal Protein (Ser235/236)                                              | Cell Signaling Technology (4858S)    | IF                 | 1:250           |
| Rabbit Anti-Ki67 (SP6)                                                                      | Thermo Fisher Scientific (MA5-14520) | IF                 | 1:100           |
| Donkey anti-Mouse IgG (H+L) Highly Cross-Adsorbed Secondary Antibody, Alexa Fluor Plus 594  | Invitrogen (A-21203)                 | IF                 | 1:500           |
| Donkey anti-Mouse IgG (H+L) Highly Cross-Adsorbed Secondary Antibody, Alexa Fluor Plus 488  | Invitrogen (A-21202)                 | IF                 | 1:200           |
| Donkey anti-Rabbit IgG (H+L) Highly Cross-Adsorbed Secondary Antibody, Alexa Fluor Plus 594 | Invitrogen (A-21207)                 | IF                 | 1:500           |
| Donkey anti-Rabbit IgG (H+L) Highly Cross-Adsorbed Secondary Antibody, Alexa Fluor Plus 488 | Invitrogen (A-21206)                 | IF                 | 1:200           |
| Anti-human CD45-eFluor                                                                      | eBioscience (69-0459-42)             | FACS               | 5 $\mu$ L/test  |
| Anti-human CD3-FITC                                                                         | eBioscience (11-0037-42)             | FACS               | 5 $\mu$ L/test  |
| Anti-human CD56-FITC                                                                        | eBioscience (11-0566-42)             | FACS               | 5 $\mu$ L/test  |
| Anti-human CD19-FITC                                                                        | eBioscience (11-0199-42)             | FACS               | 5 $\mu$ L/test  |
| Anti-human CD1c-APC                                                                         | BioLegend (331524)                   | FACS               | 5 $\mu$ L/test  |
| Anti-human CD163-PE                                                                         | eBioscience (12-1639-42)             | FACS               | 5 $\mu$ L/test  |
| Anti-human CD14-BV421                                                                       | BD Biosciences (563743)              | FACS               | 5 $\mu$ L/test  |
| 7-AAD Viability Staining Solution                                                           | eBioscience (00-6993-50)             | FACS               | 5 $\mu$ L/test  |

Abbreviation, IF: Immunofluorescence; FACS: Fluorescence-activated cell sorting.
